# Supplementary material
Source: publisher site journal article supplement (https://www.dovepress.com/article/224902)
Supplement: Supplementary file 1 [file get_supplementary_file.php]

Supplementary Figure 1


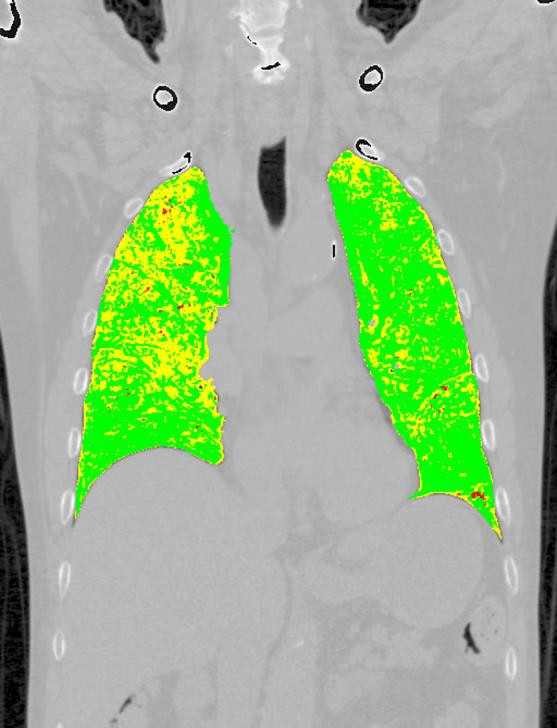


**A**


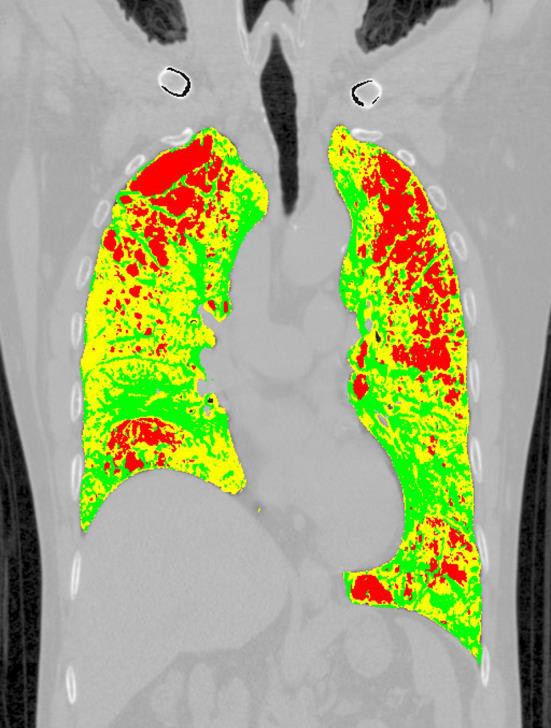


**B**

**Supplementary Figure 1** Colored DPM map images of (A) a non-COPD smoker and (B) a COPD patient.

(A) 72-year-old male. (B) 63-year-old male with a GOLD 2 classification. From the three classifications, DPMNormal is shown in green, DPMGasTrap is shown in yellow, and DPMEmph is shown in red.

DPM: disease probability measure; GOLD: Global Initiative for Chronic Obstructive Lung Disease; DPMNormal: normal lesion recognized by DPM; DPMGasTrap: gas trapping lesion recognized by DPM; DPMEmph: emphysematous lesion recognized by DPM.
